# Supplementary material
Source: HighWire-hosted journal article supplement (https://bmjopen.bmj.com/content/10/3/e033824)
Supplement: inline-supplementary-material-2 [file inline-supplementary-material-2.pdf]

**Studies of Human Performance in Older People: Health  
Questionnaire**

**Name:**

**Address:**

**Date of Birth:**

**Telephone no.:**

---

**If the answer is YES to any of the following questions, please give  
some details including dates where possible.**

---

Have you any history of heart trouble?  
(such as heart attack, angina, valve disease, palpitations, pains in chest,  
dizzy spells)

---

Have you any history of problems with blood vessels?  
(such as thrombosis, embolus, claudication, aneurysm, dizzy spells,  
stroke, blood clots)

---

Have you any history of chest problems?  
(bronchitis, asthma or wheezy chest)

---

Have you ever smoked?  
(if YES please state whether you are a current or ex-smoker and how  
much)

---

Do you suffer from diabetes?  
(if YES please state if insulin dependent)

---

Have you any history of major illness now or in the last 20 years?  
(such as rheumatoid arthritis, blood disorders, cancer)

---

Have you any history of emotional or psychiatric problems?

---

Do you suffer from osteoarthritis?  
(if YES please state joints affected and indicate mild, moderate or severe  
and any medication regularly taken)

---

Have you broken or fractured any bones? If so, when?

---

Do you have any problems with your bones?  
(osteoporosis, loss of height)

---

Have you any history of back problems? If so, when did they start and do  
they still affect you in any way?

---

Have you had any surgery on your joints? If so, when?

---

Do you suffer from high blood pressure?

---

Have you had any acute illness in the last six months?  
(such as influenza, recurrent sore-throat, bronchitis)

---

Please state any medication, prescribed or over the counter, regularly  
taken for any condition

Name of medication

How often medication is taken

---

Have you been in hospital in the last 5 years? If so, why and for how  
long?

---

Do you have any physical disabilities?  
(such as visual or hearing problems)

---

Is there any other illness or condition that affects your general health or  
interferes with your mobility?

---

Approximately how tall are you?

Approximately how much do you weigh?

---

Your Doctor's Name:

Your Doctor's Address:

---

**Thank you for completing this questionnaire**
